# Supplementary material
Source: Springer Nature journal article supplement (https://www.springermedizin.de/resource/supplementary/13099_2014_149_MOESM1_ESM.pdf/9665654)
Supplement: MOESM1 [file 9665654]

**Subsystem Coverage****Subsystem Category Distribution**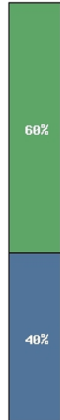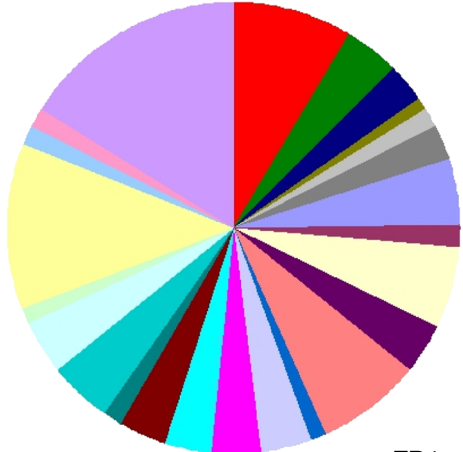

FB1

**Subsystem Feature Counts**

- Cofactors, Vitamins, Prosthetic Groups, Pigments (319)
- Cell Wall and Capsule (144)
- Virulence, Disease and Defense (99)
- Potassium metabolism (32)
- Photosynthesis (0)
- Miscellaneous (51)
- Phages, Prophages, Transposable elements, Plasmids (90)
- Membrane Transport (179)
- Iron acquisition and metabolism (60)
- RNA Metabolism (215)
- Nucleosides and Nucleotides (128)
- Protein Metabolism (275)
- Cell Division and Cell Cycle (37)
- Motility and Chemotaxis (140)
- Regulation and Cell signaling (124)
- Secondary Metabolism (6)
- DNA Metabolism (128)
- Regulons (9)
- Fatty Acids, Lipids, and Isoprenoids (122)
- Nitrogen Metabolism (46)
- Dormancy and Sporulation (3)
- Respiration (160)
- Stress Response (152)
- Metabolism of Aromatic Compounds (32)
- Amino Acids and Derivatives (441)
- Sulfur Metabolism (46)
- Phosphorus Metabolism (59)
- Carbohydrates (563)

**Subsystem Coverage****Subsystem Category Distribution**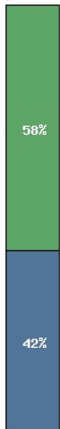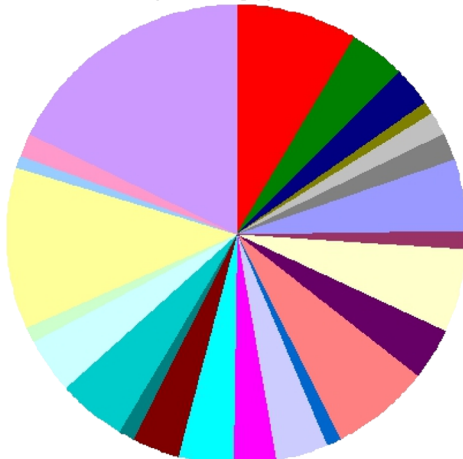

ATCC 51873

**Subsystem Feature Counts**

- Cofactors, Vitamins, Prosthetic Groups, Pigments (323)
- Cell Wall and Capsule (146)
- Virulence, Disease and Defense (97)
- Potassium metabolism (36)
- Photosynthesis (0)
- Miscellaneous (56)
- Phages, Prophages, Transposable elements, Plasmids (73)
- Membrane Transport (188)
- Iron acquisition and metabolism (54)
- RNA Metabolism (216)
- Nucleosides and Nucleotides (128)
- Protein Metabolism (258)
- Cell Division and Cell Cycle (39)
- Motility and Chemotaxis (140)
- Regulation and Cell signaling (113)
- Secondary Metabolism (5)
- DNA Metabolism (135)
- Regulons (9)
- Fatty Acids, Lipids, and Isoprenoids (124)
- Nitrogen Metabolism (48)
- Dormancy and Sporulation (3)
- Respiration (167)
- Stress Response (153)
- Metabolism of Aromatic Compounds (32)
- Amino Acids and Derivatives (422)
- Sulfur Metabolism (36)
- Phosphorus Metabolism (60)
- Carbohydrates (635)

**Subsystem Coverage****Subsystem Category Distribution**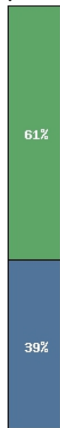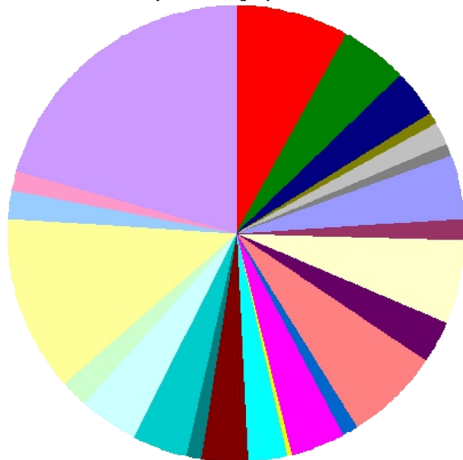

BIDMC 31

**Subsystem Feature Counts**

- Cofactors, Vitamins, Prosthetic Groups, Pigments (359)
- Cell Wall and Capsule (214)
- Virulence, Disease and Defense (144)
- Potassium metabolism (34)
- Photosynthesis (0)
- Miscellaneous (72)
- Phages, Prophages, Transposable elements, Plasmids (36)
- Membrane Transport (202)
- Iron acquisition and metabolism (74)
- RNA Metabolism (248)
- Nucleosides and Nucleotides (142)
- Protein Metabolism (293)
- Cell Division and Cell Cycle (43)
- Motility and Chemotaxis (9)
- Regulation and Cell signaling (169)
- Secondary Metabolism (17)
- DNA Metabolism (126)
- Regulons (7)
- Fatty Acids, Lipids, and Isoprenoids (141)
- Nitrogen Metabolism (46)
- Dormancy and Sporulation (5)
- Respiration (180)
- Stress Response (182)
- Metabolism of Aromatic Compounds (79)
- Amino Acids and Derivatives (553)
- Sulfur Metabolism (83)
- Phosphorus Metabolism (66)
- Carbohydrates (874)
